# Supplementary material for: A versatile platform for the highly efficient preparation of graphene quantum dots: photoluminescence emission and hydrophilicity–hydrophobicity regulation and organelle imaging
Source: Royal Society of Chemistry journal article supplement (doi:10.1039/c7nr08093j), 2017-12-13
Supplement: c7nr08093j1.pdf [file c7nr08093j1.pdf]

## Electronic Supplementary Information

### **A versatile platform for the high-efficient preparation of graphene quantum dots: photoluminescence emission and hydrophilicity-hydrophobicity regulation and organelle imaging**

*Xiaolong Wu,<sup>‡a</sup> Liling Ma,<sup>‡a</sup> Shan Sun,<sup>a</sup> Kai Jiang,<sup>a</sup> Ling Zhang,<sup>a</sup> Yuhui Wang,<sup>\*a</sup> Haibo Zeng,<sup>b</sup> and Hengwei Lin<sup>\*a</sup>*

<sup>a</sup> Key Laboratory of Additive Manufacturing Materials of Zhejiang Province & Ningbo Institute of Materials Technology & Engineering (NIMTE), Chinese Academy of Sciences (CAS), Ningbo 315201, P. R. China

<sup>b</sup> Key Laboratory of Advanced Display Materials and Devices (Ministry of Industry and Information Technology), Nanjing University of Science and Technology, Nanjing, 210094, P. R. China

<sup>‡</sup> These authors contributed equally.

\* E-mail: E-mail: wangyuhui@nimte.ac.cn (Y.W.) or linhengwei@nimte.ac.cn (H. L.)

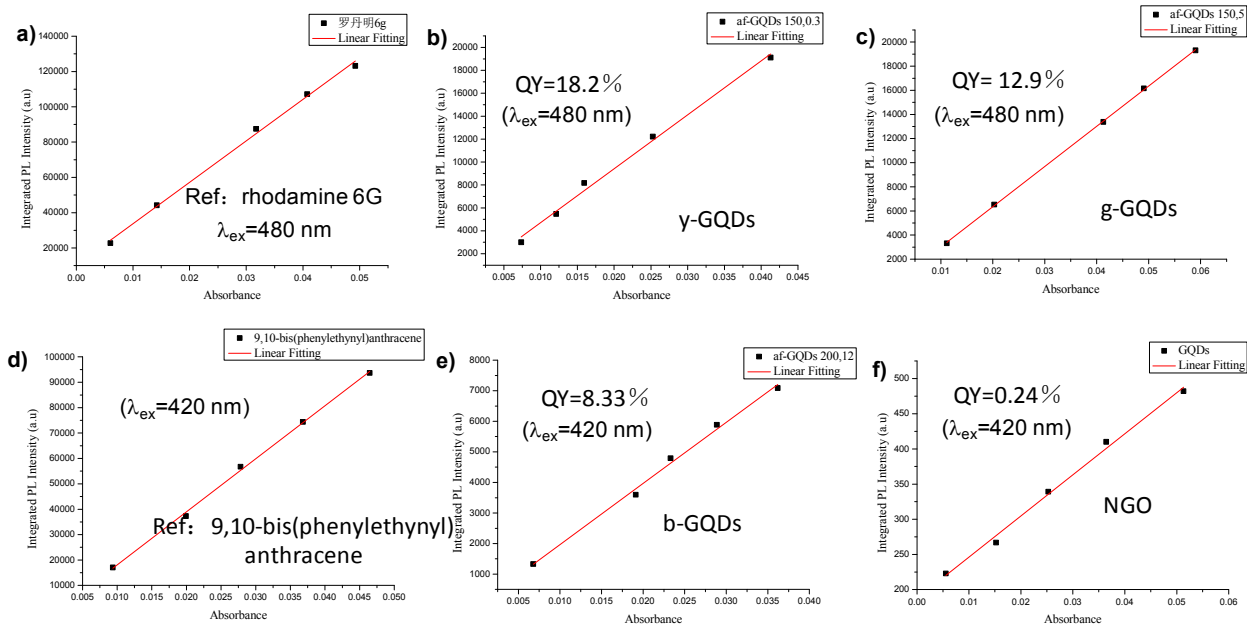

**Fig. S1** a-c) PL quantum yields of the  $\gamma$ -GQDs and g-GQDs were determined by referenced rhodamine 6G at excitation wavelength of 480 nm; d-f) PL quantum yields of the b-GQDs and NGO were determined by referenced 9,10-bis(phenylethynyl) anthracene at excitation wavelength of 420 nm.

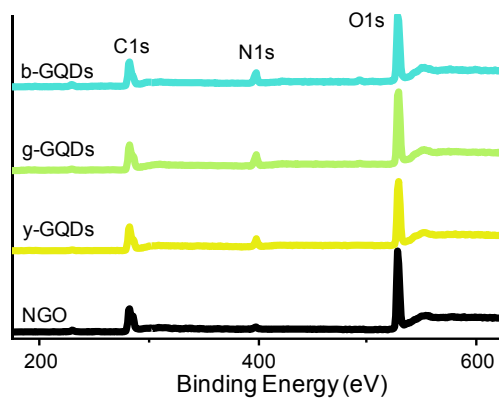

**Fig. S2** XPS spectra of the NGO, b-GQDs, g-GQDs, and  $\gamma$ -GQDs.

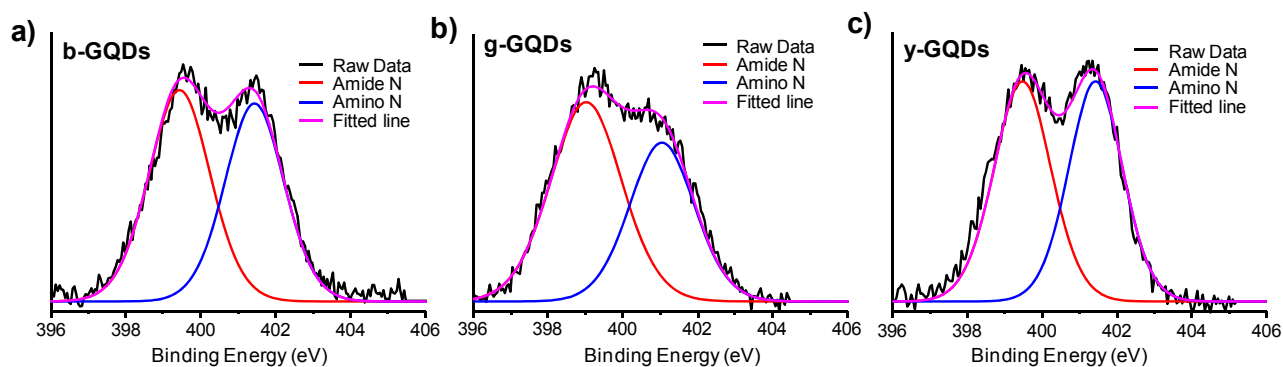

**Fig. S3** High-Resolution N1s XPS spectra of *b*-GQDs (a), *g*-GQDs (b) and *y*-GQDs (c).

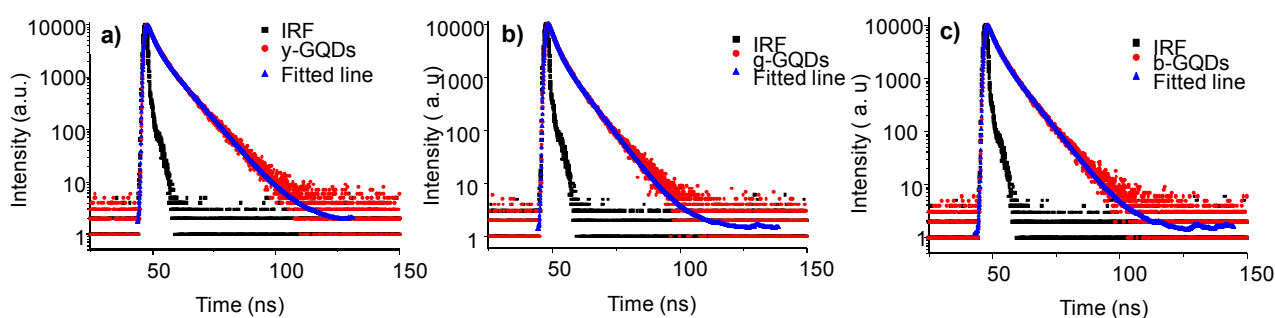

**Fig. S4** PL decay profiles of *y*-GQDs (a), *g*-GQDs (b), and *b*-GQDs (c), respectively.

**Table S1.** PL lifetimes of the *b*-, *g*- and *y*-GQDs and relative contents of the two components by fitting the corresponding time-resolved spectra.

| Sample         | $\lambda_{Em}$ (nm) | $\tau_1$ (ns) | $R_1$ (%) | $\tau_2$ (ns) | $R_2$ (%) | $\tau_{average}$ (ns) |
|----------------|---------------------|---------------|-----------|---------------|-----------|-----------------------|
| <i>y</i> -GQDs | 554                 | 2.2           | 37.4      | 8.0           | 62.6      | 4.0                   |
| <i>g</i> -GQDs | 520                 | 2.1           | 46.1      | 7.0           | 53.9      | 3.4                   |
| <i>b</i> -GQDs | 495                 | 2.3           | 39.0      | 7.2           | 61.0      | 3.9                   |

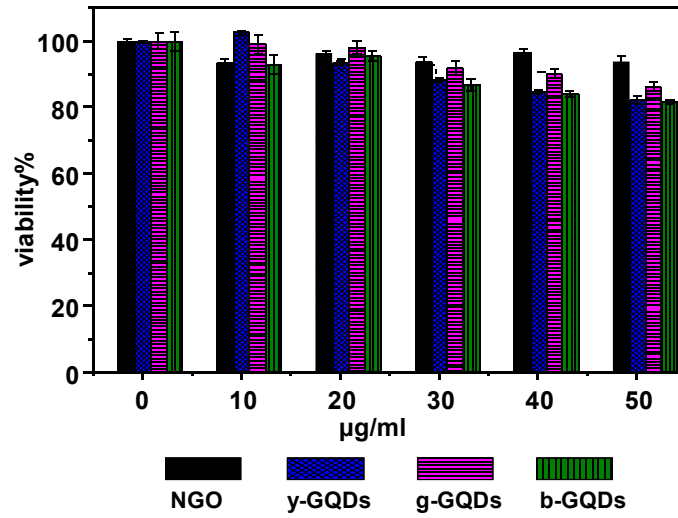

**Fig. S5** Cellular cytotoxicity measurement of the NGO, y-GQDs, g-GQDs, and b-GQDs against MCF-7 by the MTT assay.

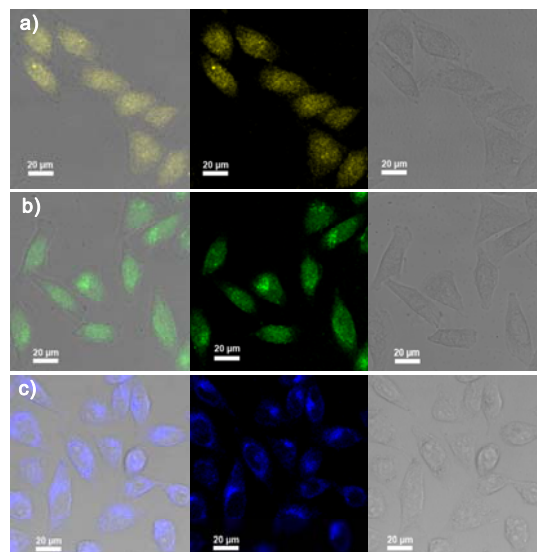

**Fig. S6** Cell imaging property of the y-GQDs (a), g-GQDs (b), and b-GQDs (c) against MCF-7 under fluorescent field (middle), bright filed (right), and their merged images (left).

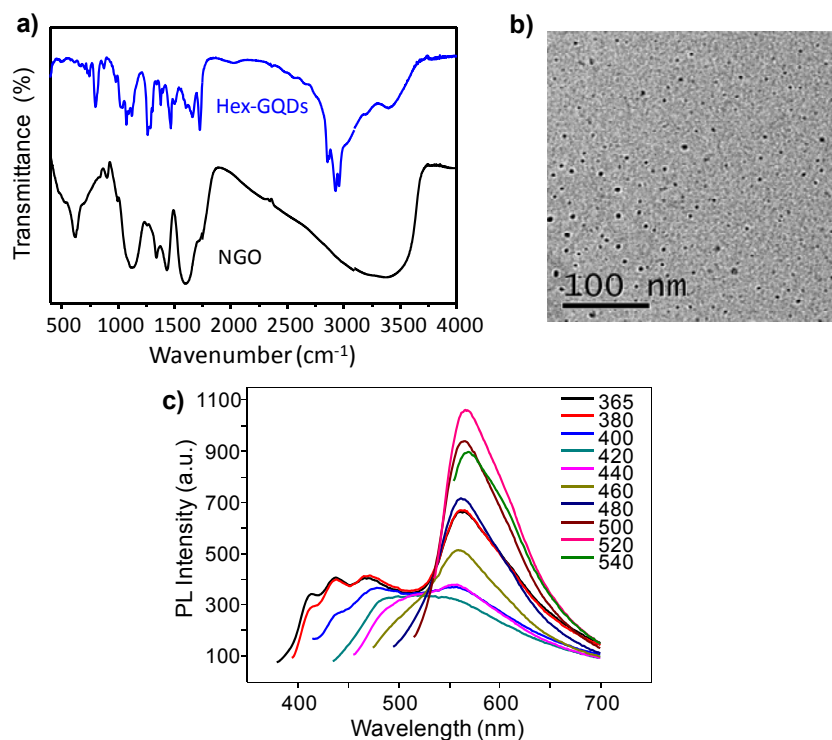

**Fig. S7** FT-IR spectrum (a), TEM image (b), and PL emission (c) of the Hex-GQDs (in toluene) with different excitation wavelengths.

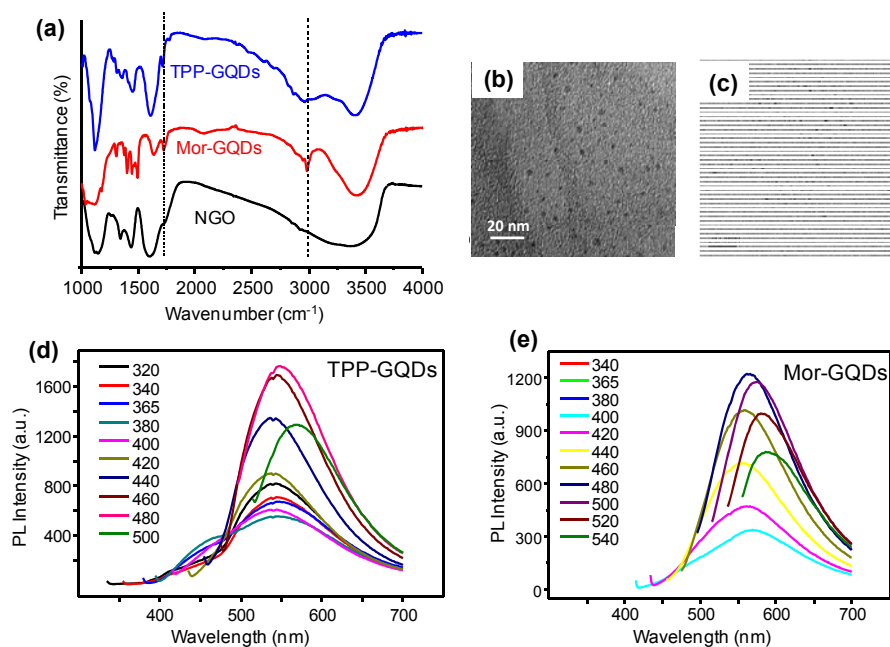

**Fig. S8** FT-IR spectra of the NGO (black line), TPP-GQDs (blue line) and Mor-GQDs (red line) (a); TEM images of TPP-GQDs (b) and Mor-GQDs (c); Fluorescence emission spectra of the TPP-GQDs (d) and Mor-GQDs (e) under different excitation wavelengths.

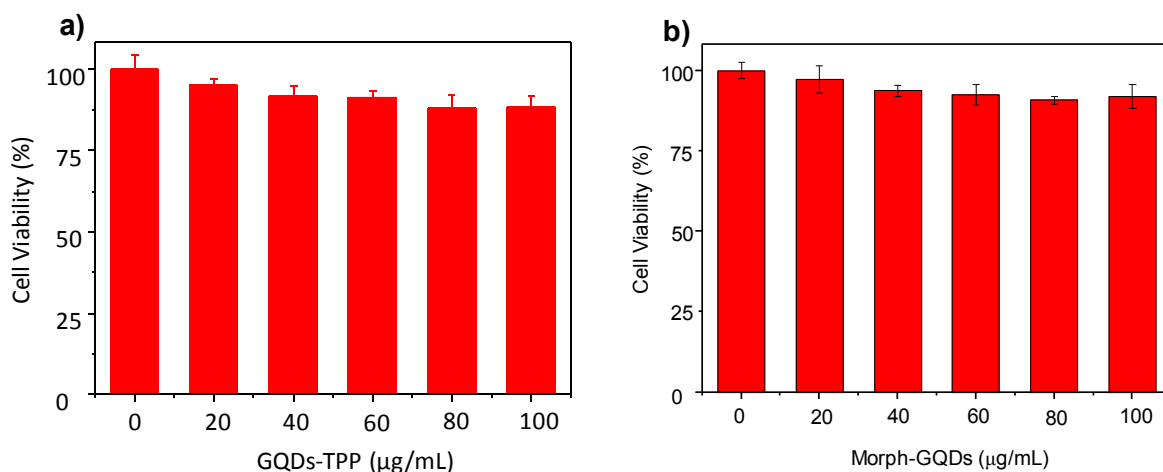

**Fig. S9** Cellular cytotoxicity measurement of TPP-GQDs (a) and Mor-GQDs (b) (both from 20 to 100  $\mu\text{g/mL}$ ) through the standard MTT assay toward MCF-7 cells.

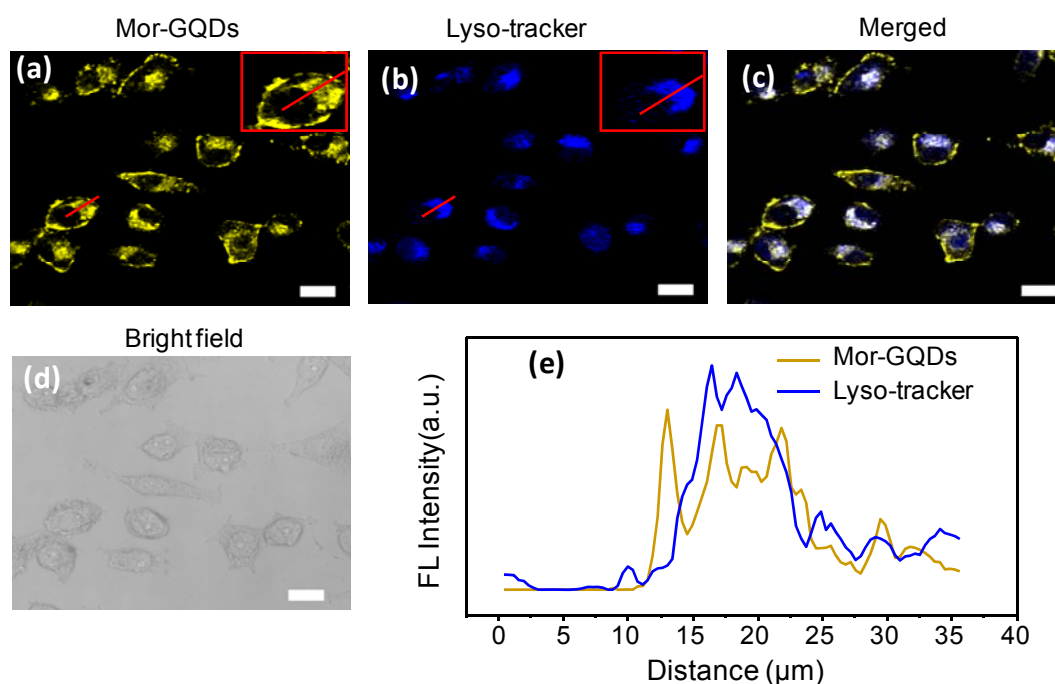

**Fig. S10** Co-localization of Mor-GQDs and Lyso-tracker in MCF-7 cells. The fluorescence images were collected at 520–650 nm (a, for Mor-GQDs) and 430–500 nm (b, for Lyso-tracker), respectively, with excitation at 488 nm. (c) Merged images. (d) Bright filed image. (e) Fluorescence intensity profile of linear region of interest across a selected single cell. Scale bar: 20  $\mu\text{m}$ .
